# Supplementary material
Source: PubMed Central journal article supplement (PMC11027858)
Supplement: 262_2019_2452_MOESM1_ESM.pdf [file 262_2019_2452_MOESM1_ESM.pdf]

**a**

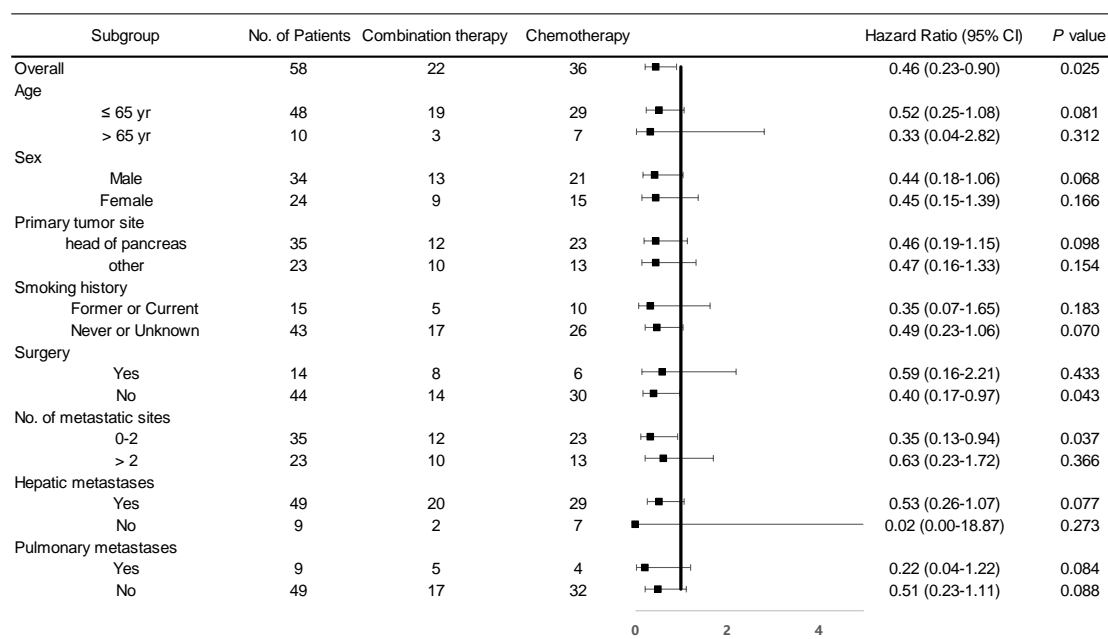

**b**

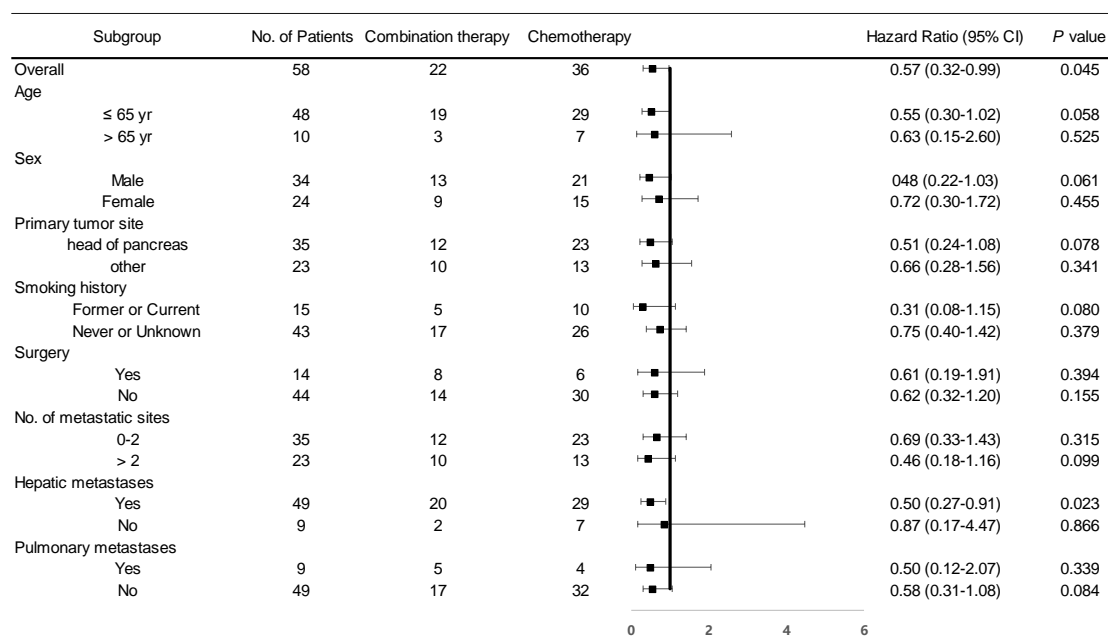

**Supplementary Figure S1.** Forest plots of overall survival (a) and progression-free survival (b) in patient subgroups between the combination group and chemotherapy group.

**Supplementary Table S1. Treatment received by patients in the combination group and chemotherapy group.**

| <b>Subject ID</b> | <b>Combination group</b>                     |
|-------------------|----------------------------------------------|
| Patient 1         | nivolumab + nab-paclitaxel                   |
| Patient 2         | nivolumab + gemcitabine + nab-paclitaxel     |
| Patient 3         | nivolumab + gemcitabine + nab-paclitaxel     |
| Patient 4         | nivolumab + gemcitabine + nab-paclitaxel     |
| Patient 5         | nivolumab + bicycloplatin                    |
| Patient 6         | nivolumab + oxaliplatin                      |
| Patient 7         | nivolumab + tegafur                          |
| Patient 8         | nivolumab + gemcitabine                      |
| Patient 9         | pembrolizumab + gemcitabine                  |
| Patient 10        | nivolumab + nab-paclitaxel + tegafur         |
| Patient 11        | nivolumab + gemcitabine + nab-paclitaxel     |
| Patient 12        | atezolizumab + nab-paclitaxel + tegafur      |
| Patient 13        | nivolumab + gemcitabine + nab-paclitaxel     |
| Patient 14        | nivolumab + nab-paclitaxel                   |
| Patient 15        | nivolumab + gemcitabine + nab-paclitaxel     |
| Patient 16        | nivolumab + gemcitabine + nab-paclitaxel     |
| Patient 17        | pembrolizumab + gemcitabine + nab-paclitaxel |
| Patient 18        | nivolumab + gemcitabine + nab-paclitaxel     |
| Patient 19        | nivolumab + gemcitabine + paclitaxel         |
| Patient 20        | nivolumab + nab-paclitaxel + tegafur         |
| Patient 21        | pembrolizumab + bicycloplatin                |
| Patient 22        | pembrolizumab + gemcitabine                  |
| <b>Subject ID</b> | <b>Chemotherapy group</b>                    |
| Patient 1         | nab-paclitaxel + tegafur                     |
| Patient 2         | gemcitabine                                  |
| Patient 3         | nab-paclitaxel + tegafur                     |
| Patient 4         | nab-paclitaxel + tegafur                     |
| Patient 5         | nab-paclitaxel + tegafur                     |
| Patient 6         | gemcitabine + S-1                            |
| Patient 7         | gemcitabine + S-1                            |
| Patient 8         | nab-paclitaxel + tegafur                     |
| Patient 9         | gemcitabine + S-1                            |
| Patient 10        | nab-paclitaxel + tegafur                     |
| Patient 11        | gemcitabine + cisplatin                      |
| Patient 12        | gemcitabine + S-1                            |
| Patient 13        | nab-paclitaxel + tegafur                     |
| Patient 14        | nab-paclitaxel + tegafur                     |
| Patient 15        | nab-paclitaxel + tegafur                     |
| Patient 16        | gemcitabine + S-1                            |
| Patient 17        | gemcitabine + S-1                            |

---

|            |                              |
|------------|------------------------------|
| Patient 18 | nab-paclitaxel               |
| Patient 19 | nab-paclitaxel + tegafur     |
| Patient 20 | gemcitabine + S-1            |
| Patient 21 | gemcitabine + S-1            |
| Patient 22 | gemcitabine + nab-paclitaxel |
| Patient 23 | gemcitabine + nab-paclitaxel |
| Patient 24 | gemcitabine + nab-paclitaxel |
| Patient 25 | gemcitabine + S-1            |
| Patient 26 | gemcitabine + nab-paclitaxel |
| Patient 27 | nab-paclitaxel + tegafur     |
| Patient 28 | nab-paclitaxel + tegafur     |
| Patient 29 | nab-paclitaxel + tegafur     |
| Patient 30 | nab-paclitaxel + tegafur     |
| Patient 31 | nab-paclitaxel + tegafur     |
| Patient 32 | nab-paclitaxel + tegafur     |
| Patient 33 | gemcitabine                  |
| Patient 34 | gemcitabine + nab-paclitaxel |
| Patient 35 | gemcitabine + S-1            |
| Patient 36 | nab-paclitaxel + tegafur     |

---
